# Supplementary material for: Transcriptome of Nosema ceranae and Upregulated Microsporidia Genes during Its Infection of Western Honey Bee (Apis mellifera)
Source: MDPI journal article supplement (doi:10.3390/insects13080716), 2022-08-09
Supplement: s1 [file s1]

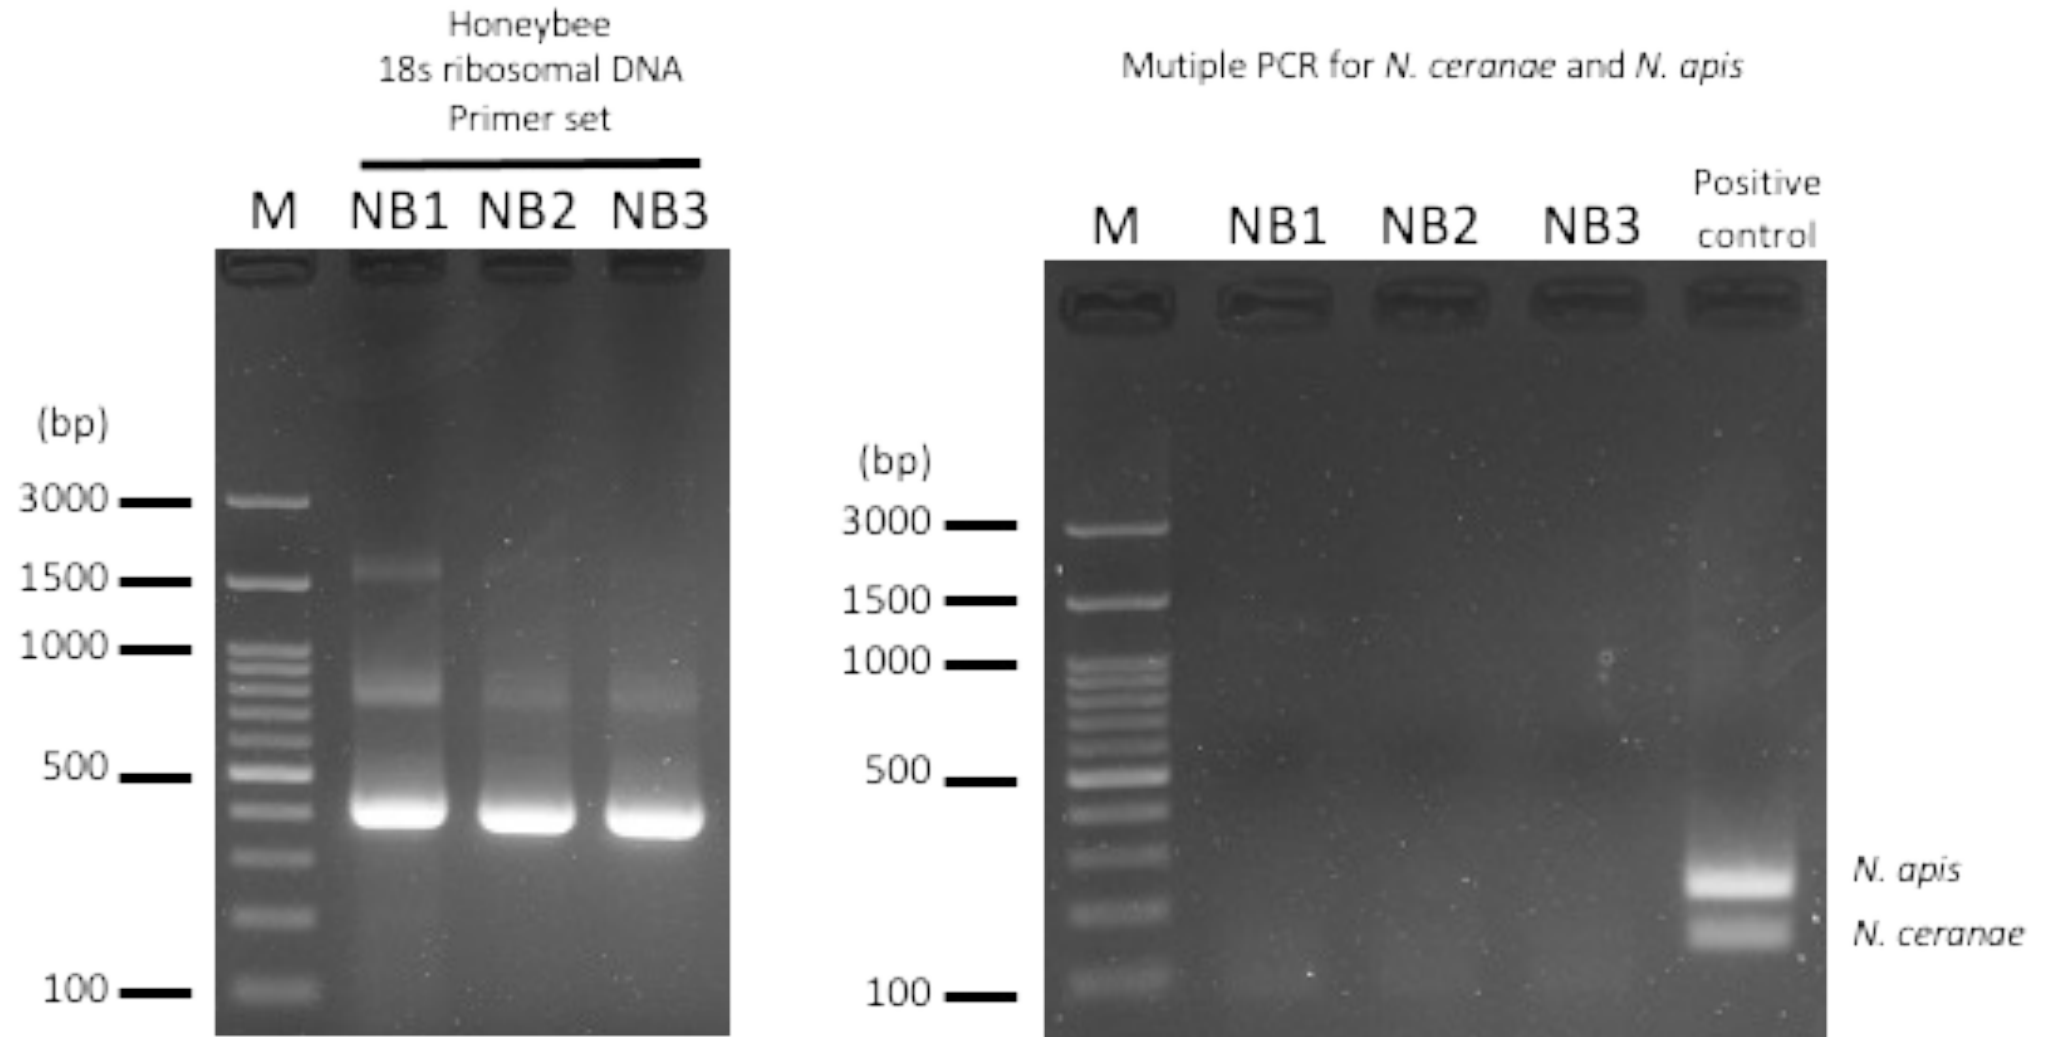

**Supplementary Figure S1.** The detection of *Nosema* spp. of newly emerged adult honey bees by multiplex PCR before experiment. The information of primer sets were listed in Supplementary Table 1.

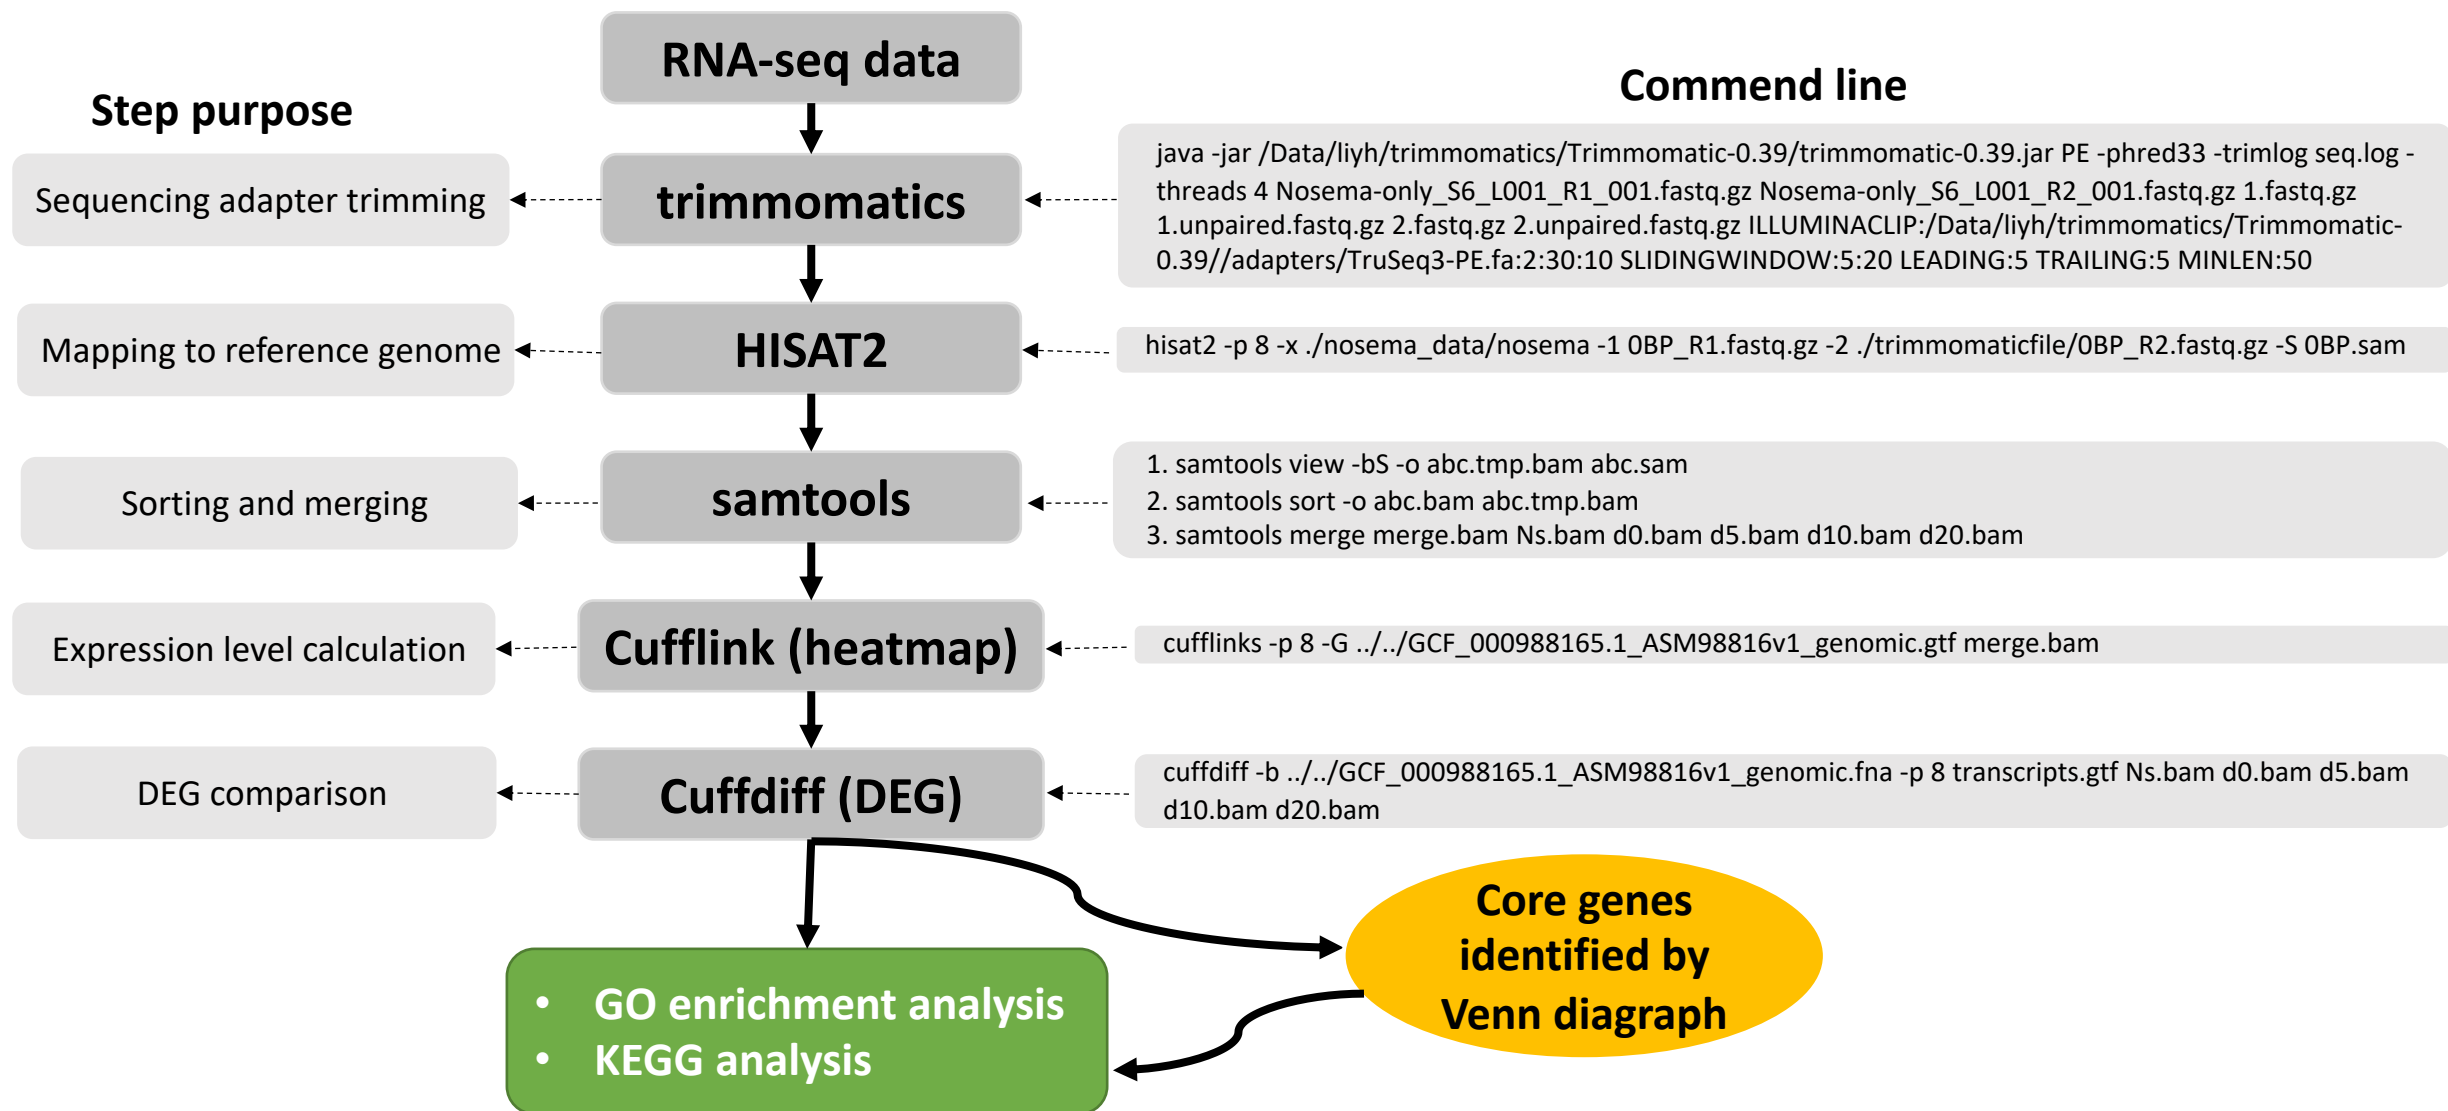

**Supplementary Figure S2.** The pipeline of transcriptome analysis. The commend lines and analysis purposes are noted pairwise the item. DEG= differential expressed gene; FPKM= fragment per kilobase per million; GO= gene ontology; KEGG= Kyoto Encyclopedia of Genes and Genomes.
